# Supplementary material for: Hierarchical LiMnPO4 assembled from nanosheets via a solvothermal method as a high performance cathode material
Source: Royal Society of Chemistry journal article supplement (doi:10.1039/c5ra14040d), 2015-01-01
Supplement: c5ra14040d1.pdf [file c5ra14040d1.pdf]

## Supplementary material

### Hierarchical $\text{LiMnPO}_4$ assembled from nanosheets via solvothermal method as high performance cathode material

Zhijian Zhang<sup>1</sup>, Guorong Hu<sup>1</sup>, Yanbing Cao<sup>1\*</sup>, Jianguo Duan<sup>1</sup>, Ke Du<sup>1</sup>, Zhongdong Peng<sup>1</sup>

<sup>1</sup>*School of Metallurgy and Environment, Central South University, Changsha 410083, China. E-mail address: cybcsu@csu.edu.cn; Tel: +86-13875868540; Fax: +86-0731-88830474.*

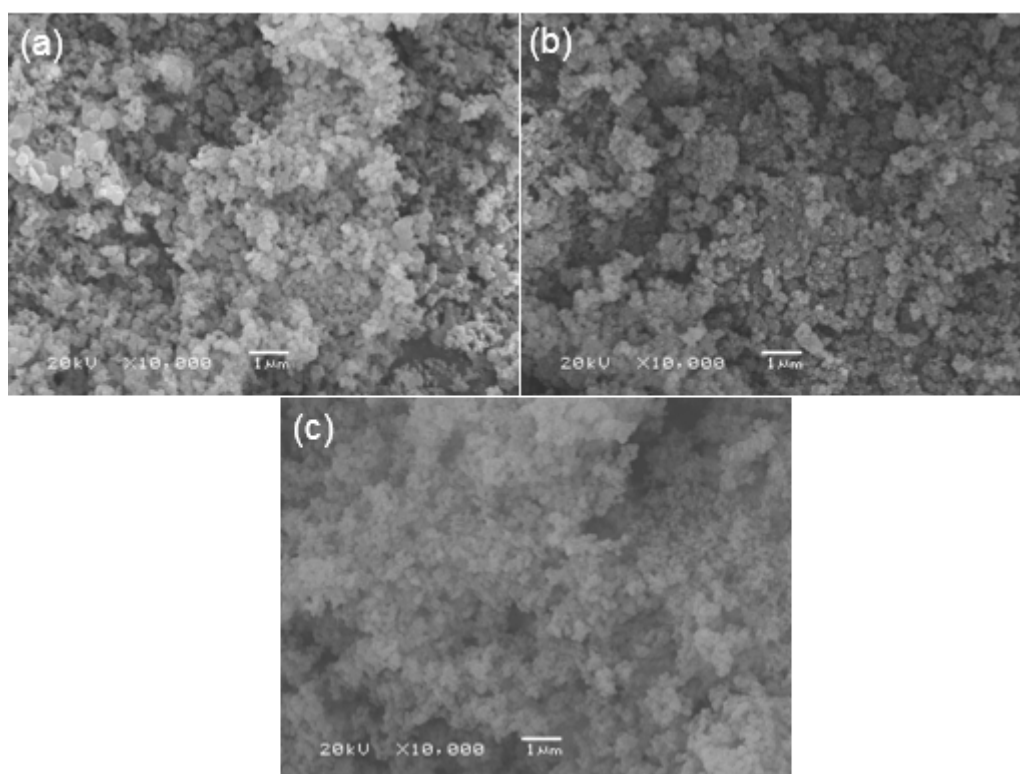

Fig. S1 the SEM images of the precursors tailoring with different Li:Mn:P molar ratio: (a) 2:1:1; (b) 2.5:1:1; (c) 3:1:1.
